# Supplementary material for: Genomic characterization of Tenacibaculum maritimum O‐antigen gene cluster and development of a multiplex PCR‐based serotyping scheme
Source: PubMed Central journal article supplement — Transbound Emerg Dis. 2022 Jul 8;69(5):e2876–88. doi: 10.1111/tbed.14637 (PMC9796276; doi:10.1111/tbed.14637), 2022-07-08

*Flavobacterium psychrophilum*, strain JIP02/86

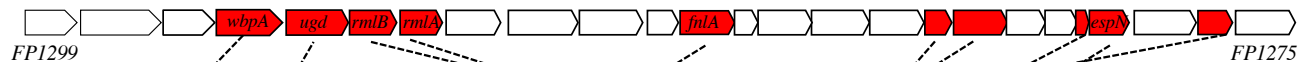

*Tenacibaculum maritimum*, strain NCIMB 2154<sup>T</sup>

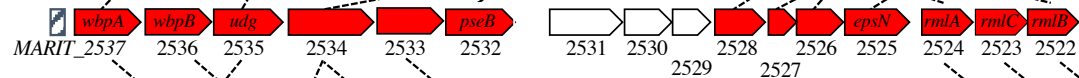

*Tenacibaculum dicentrarchi*, strain USC 35/09<sup>T</sup>

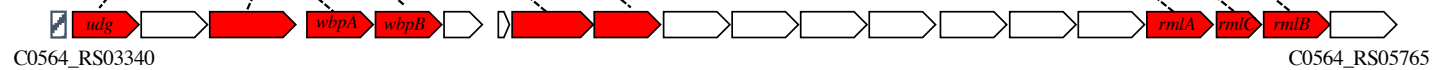

Supplement: TBED-69-e2876-s003.pdf [file TBED-69-e2876-s003.pdf]
