# Supplementary figures and images for: Genomic characterization of Tenacibaculum maritimum O‐antigen gene cluster and development of a multiplex PCR‐based serotyping scheme
Source: PubMed Central journal article supplement — Transbound Emerg Dis. 2022 Jul 8;69(5):e2876–88. doi: 10.1111/tbed.14637 (PMC9796276; doi:10.1111/tbed.14637), 2022-07-08

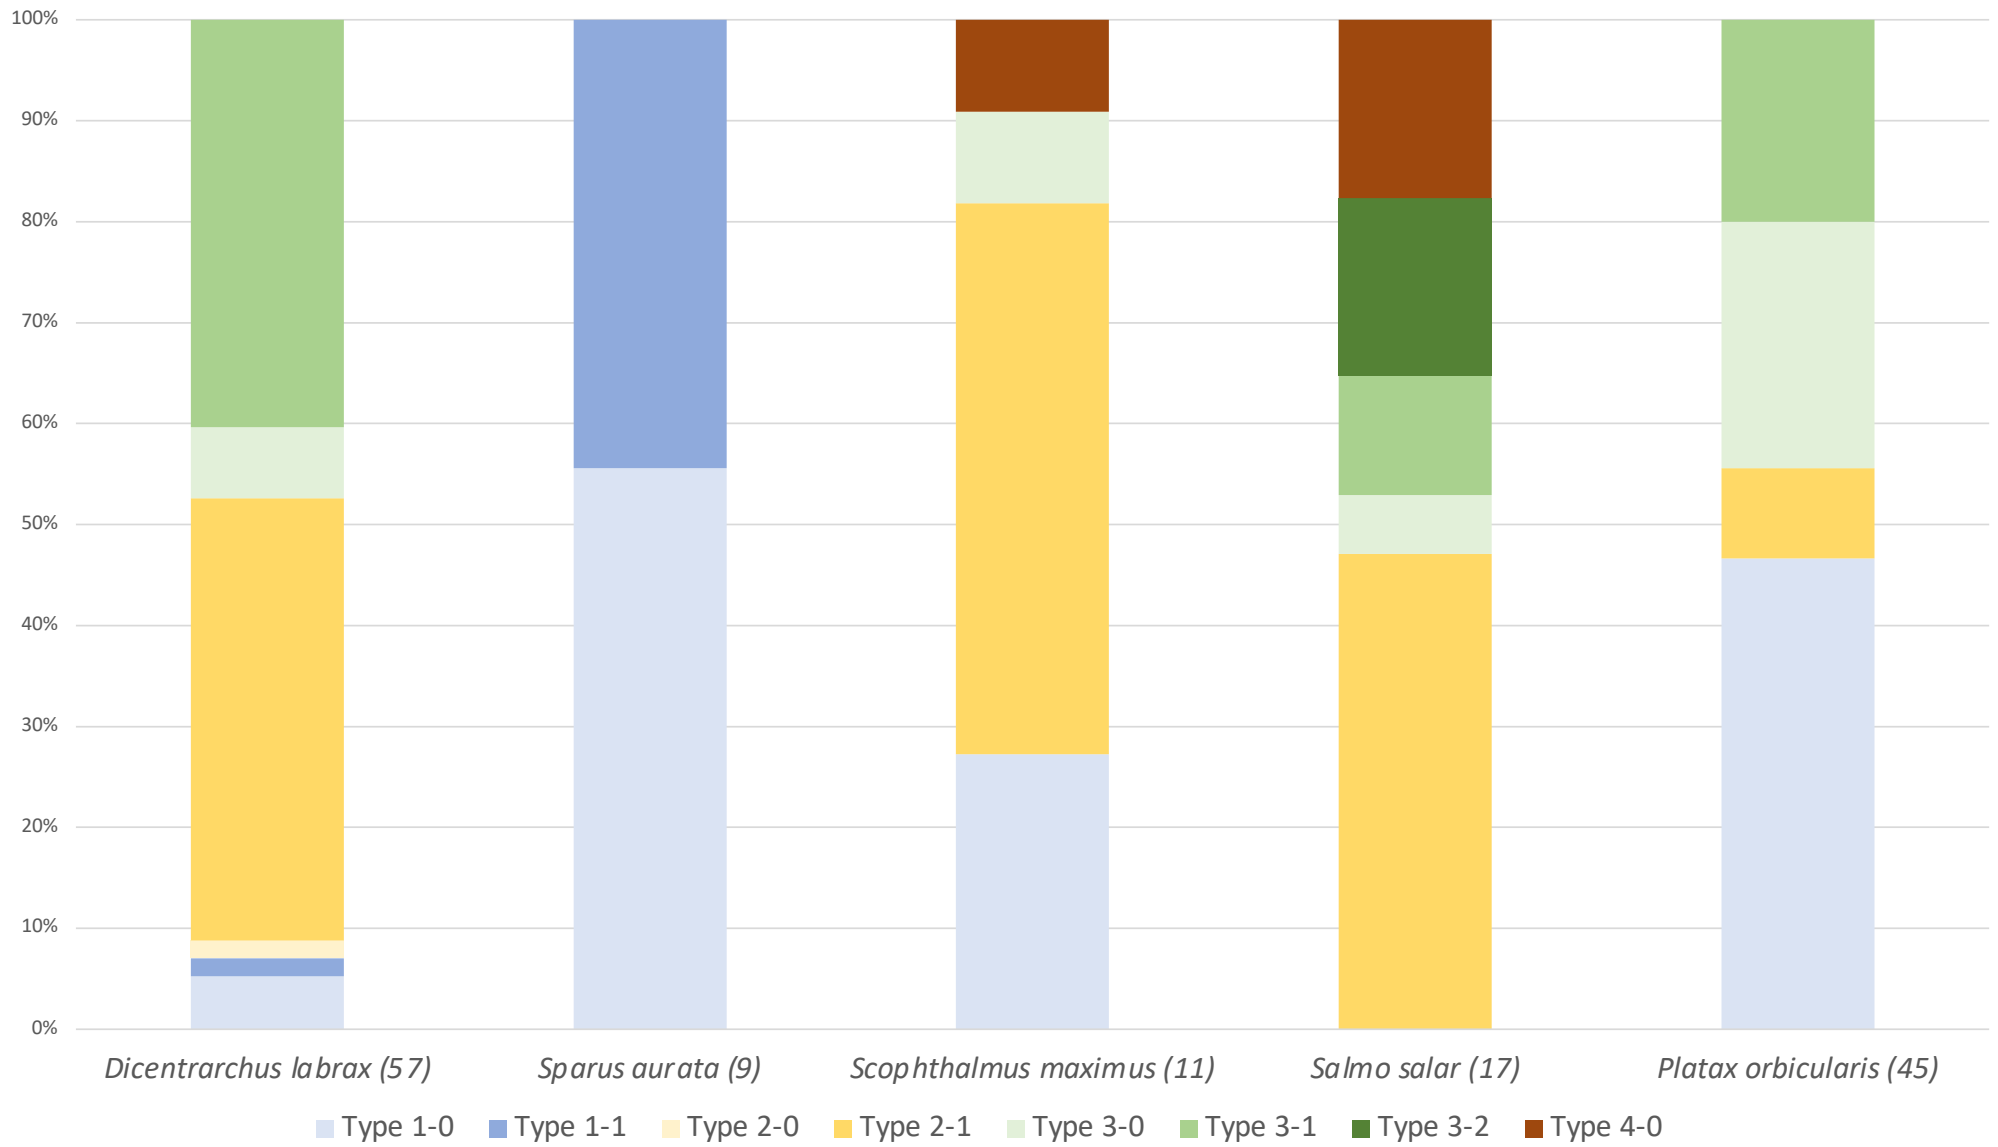

Supplement: TBED-69-e2876-s002.pdf [file TBED-69-e2876-s002.pdf]
